# Supplementary material for: Targeting Pancreatic Ductal Adenocarcinoma Acidic Microenvironment
Source: PubMed Central journal article supplement — Sci Rep. 2014 Mar 19;4:4410. doi: 10.1038/srep04410 (PMC3958716; doi:10.1038/srep04410), 2014-03-19

## **Targeting Pancreatic Ductal Adenocarcinoma Acidic Microenvironment**

Zobeida Cruz-Monserrate<sup>1</sup>, Christina L. Roland<sup>2</sup>, Defeng Deng<sup>1</sup>, Thiruvengadam Arumugam<sup>1</sup>,  
Anna Moshnikova<sup>3</sup>, Oleg A. Andreev<sup>3</sup>, Yana K. Reshetnyak<sup>3</sup> and Craig D. Logsdon<sup>\*1,4</sup>

**Supplementary Information**

**Supplementary Table 1S.** Mean (and SEM) of luminescence signal in pancreas and fluorescence signal of Alexa647-WT-pHLIP in pancreas, kidney, liver and lung obtained after image analysis of organs from athymic nude mice without and with tumor (orthotopic model of PDAC with luciferase-labeled Capan-2 cells. The data are shown on Figure 1.

|                                                                            | <b>Normal, + WT</b><br><i>n</i> = 5 | <b>Tumor, - WT</b><br><i>n</i> = 5 | <b>Tumor, + WT</b><br><i>n</i> = 5 |
|----------------------------------------------------------------------------|-------------------------------------|------------------------------------|------------------------------------|
| <b>Pancreas</b><br>luminescence<br>$\times 10^7$ , p/s/cm <sup>2</sup> /sr | 0.013 ± 0.004                       | 3.493 ± 1.718                      | 4.634 ± 2.889                      |
| <b>Pancreas</b><br>fluorescence $\times 10^{-4}$                           | 0.209 ± 0.079                       | 0.055 ± 0.010                      | 0.747 ± 0.129                      |
| <b>Kidney</b><br>fluorescence $\times 10^{-4}$                             | 0.307 ± 0.065                       | 0.035 ± 0.011                      | 1.283 ± 0.151                      |
| <b>Liver</b><br>fluorescence $\times 10^{-4}$                              | 0.416 ± 0.220                       | 0.060 ± 0.007                      | 0.857 ± 0.249                      |
| <b>Lung</b><br>fluorescence $\times 10^{-4}$                               | 0.061 ± 0.022                       | 0.031 ± 0.005                      | 0.084 ± 0.005                      |

**Table 2S.** Mean (and SEM) of fluorescence signal of Alexa546-WT-pHLIP and Alexa546-2K-WT-pHLIP in pancreas, kidney, liver and lung obtained after image analysis of organs from GEMMs with normal pancreas (non-tumor bearing mice) or PDAC (tumor bearing mice). The data are shown on Figure 3.

|                                                   | <b>Normal, WT</b><br><i>n</i> = 5 | <b>Tumor, WT</b><br><i>n</i> = 5 | <b>Normal, 2K-WT</b><br><i>n</i> = 5 | <b>Tumor, 2K-WT</b><br><i>n</i> = 5 |
|---------------------------------------------------|-----------------------------------|----------------------------------|--------------------------------------|-------------------------------------|
| <b>Pancreas</b><br>fluorescence x10 <sup>-4</sup> | 0.136 ± 0.042                     | 2.396 ± 0.392                    | 0.039 ± 0.010                        | 0.555 ± 0.265                       |
| <b>Kidney</b><br>fluorescence x10 <sup>-4</sup>   | 0.123 ± 0.021                     | 0.524 ± 0.024                    | 0.031 ± 0.003                        | 0.085 ± 0.026                       |
| <b>Liver</b><br>fluorescence x10 <sup>-4</sup>    | 0.272 ± 0.022                     | 0.670 ± 0.099                    | 0.415 ± 0.105                        | 0.837 ± 0.307                       |
| <b>Lung</b><br>fluorescence x10 <sup>-4</sup>     | 0.018 ± 0.003                     | 0.029 ± 0.004                    | 0.012 ± 0.001                        | 0.047 ± 0.013                       |

**Table 3S.** Mean (and SEM) of fluorescence signal of Alexa546-WT-pHLIP in pancreas, kidney, liver and lung obtained after image analysis of organs from non-tumor bearing mice, tumor bearing mice, mice containing PanIN lesions and mice with pancreatitis. The data are shown on Figure 5.

|                                                   | <b>Normal,<br/>- WT<br/><i>n</i> = 5</b> | <b>Tumor,<br/>- WT<br/><i>n</i> = 5</b> | <b>Normal,<br/>+ WT<br/><i>n</i> = 5</b> | <b>Pancreatitis,<br/>+ WT<br/><i>n</i> = 5</b> | <b>PanIN,<br/>+ WT<br/><i>n</i> = 5</b> | <b>Tumor,<br/>+ WT<br/><i>n</i> = 5</b> |
|---------------------------------------------------|------------------------------------------|-----------------------------------------|------------------------------------------|------------------------------------------------|-----------------------------------------|-----------------------------------------|
| <b>Pancreas</b><br>fluorescence x10 <sup>-4</sup> | 0.032 ± 0.013                            | 0.074 ± 0.003                           | 0.046 ± 0.016                            | 0.111 ± 0.020                                  | 0.421 ± 0.127                           | 1.789 ± 0.467                           |
| <b>Kidney</b><br>fluorescence x10 <sup>-4</sup>   | 0.033 ± 0.011                            | 0.015 ± 0.003                           | 0.267 ± 0.021                            | 0.271 ± 0.060                                  | 0.297 ± 0.045                           | 0.687 ± 0.193                           |
| <b>Liver</b><br>fluorescence x10 <sup>-4</sup>    | 0.060 ± 0.006                            | 0.059 ± 0.009                           | 0.839 ± 0.126                            | 0.682 ± 0.101                                  | 1.075 ± 0.055                           | 0.802 ± 0.270                           |
| <b>Lung</b><br>fluorescence x10 <sup>-4</sup>     | 0.024 ± 0.002                            | 0.024 ± 0.004                           | 0.084 ± 0.010                            | 0.096 ± 0.006                                  | 0.091 ± 0.015                           | 0.129 ± 0.030                           |

**Table 4S.** Mean (and SEM) of fluorescence signal of Alexa647-Var3-pHLIP and Alexa546-Var7-pHLIP in pancreas, kidney, liver and lung obtained after image analysis of organs from GEMMs with normal pancreas (non-tumor bearing mice) or PDAC (tumor bearing mice). The data are shown on Figure 6.

|                                                   | <b>Normal,<br/>Var3<br/><i>n</i> = 5</b> | <b>Tumor,<br/>Var3<br/><i>n</i> = 5</b> | <b>Normal,<br/>Var7<br/><i>n</i> = 5</b> | <b>Tumor,<br/>Var7<br/><i>n</i> = 5</b> |
|---------------------------------------------------|------------------------------------------|-----------------------------------------|------------------------------------------|-----------------------------------------|
| <b>Pancreas</b><br>fluorescence x10 <sup>-4</sup> | 0.078 ± 0.009                            | 0.967 ± 0.280                           | 0.023 ± 0.002                            | 0.524 ± 0.081                           |
| <b>Kidney</b><br>fluorescence x10 <sup>-4</sup>   | 0.517 ± 0.061                            | 1.865 ± 0.577                           | 0.110 ± 0.016                            | 0.401 ± 0.078                           |
| <b>Liver</b><br>fluorescence x10 <sup>-4</sup>    | 0.359 ± 0.026                            | 0.474 ± 0.117                           | 0.064 ± 0.007                            | 0.095 ± 0.017                           |
| <b>Lung</b><br>fluorescence x10 <sup>-4</sup>     | 0.079 ± 0.003                            | 0.130 ± 0.024                           | 0.010 ± 0.001                            | 0.013 ± 0.001                           |

**Supplementary Figure S1: WT-pHLIP efficiently detects human pancreatic cancer xenografts.** Representative *in vivo* bioluminescent (A, B) and fluorescent (C, D) images of athymic nude mice without tumor and with tumor (orthotopic model of PDAC with luciferase-labeled Capan-2 cells) injected with 40  $\mu\text{M}$  of Alexa647-WT-pHLIP in 100  $\mu\text{l}$  of PBS (+WT-pHLIP) or PBS only (-WT-pHLIP).

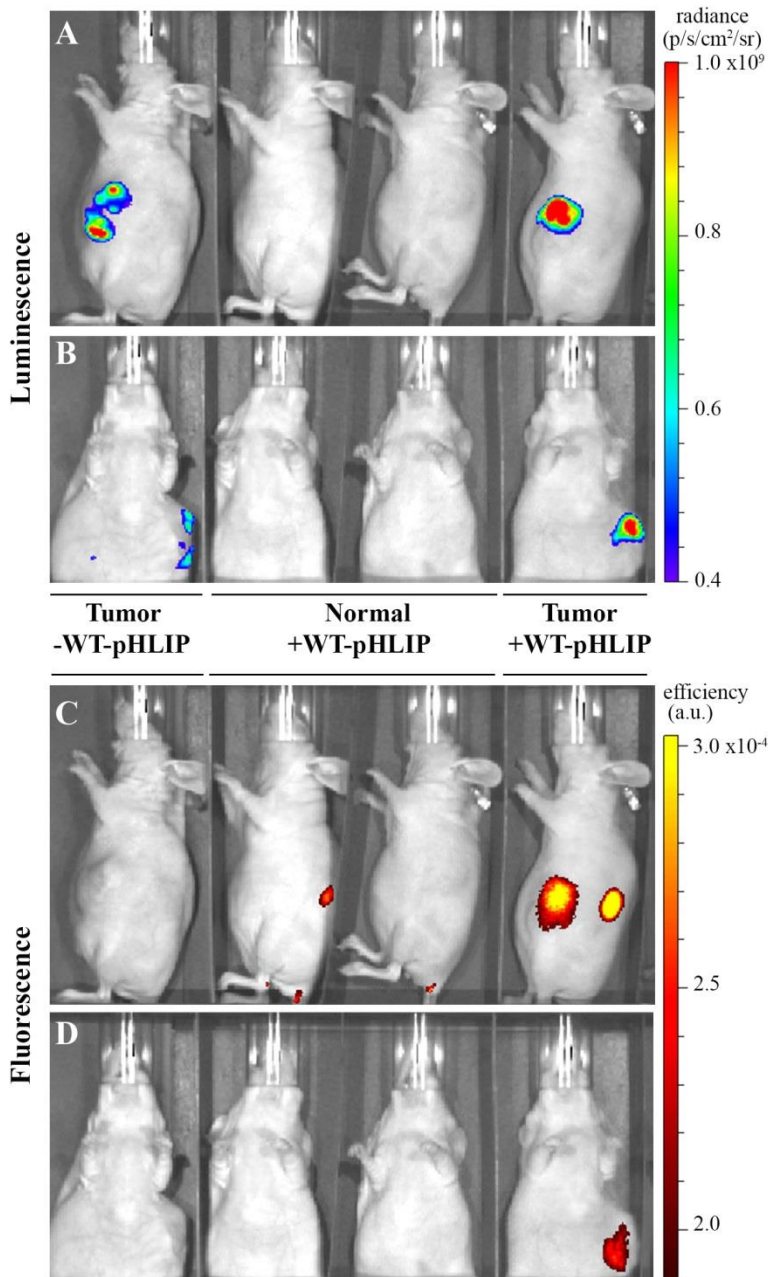

Supplement: srep04410-s1.pdf [file srep04410-s1.pdf]
